# Supplementary material for: Anti-malarial, anti-algal, anti-tubercular, anti-bacterial, anti-photosynthetic, and anti-fouling activity of diterpene and diterpene isonitriles from the tropical marine sponge Cymbastela hooperi
Source: Royal Society of Chemistry journal article supplement (doi:10.1039/c0ob00326c), 2010-09-17
Supplement: c0ob00326c.pdf [file c0ob00326c.pdf]

# Anti-malarial, anti-algal, anti-tubercular, anti-bacterial, anti-photosynthetic, and anti-fouling activity of diterpene and diterpene isonitriles from the tropical marine sponge *Cymbastela hooperi*.

Anthony D. Wright,<sup>a\*</sup> Adam McCluskey,<sup>b</sup> Christopher P. Gordon,<sup>b</sup> and Jana Guenther<sup>c</sup>

<sup>5</sup> Received (in XXX, XXX) Xth XXXXXXXXXX 200X, Accepted Xth XXXXXXXXXX 200X

First published on the web Xth XXXXXXXXXX 200X

DOI: 10.1039/b000000x

## Supplementary Data

10

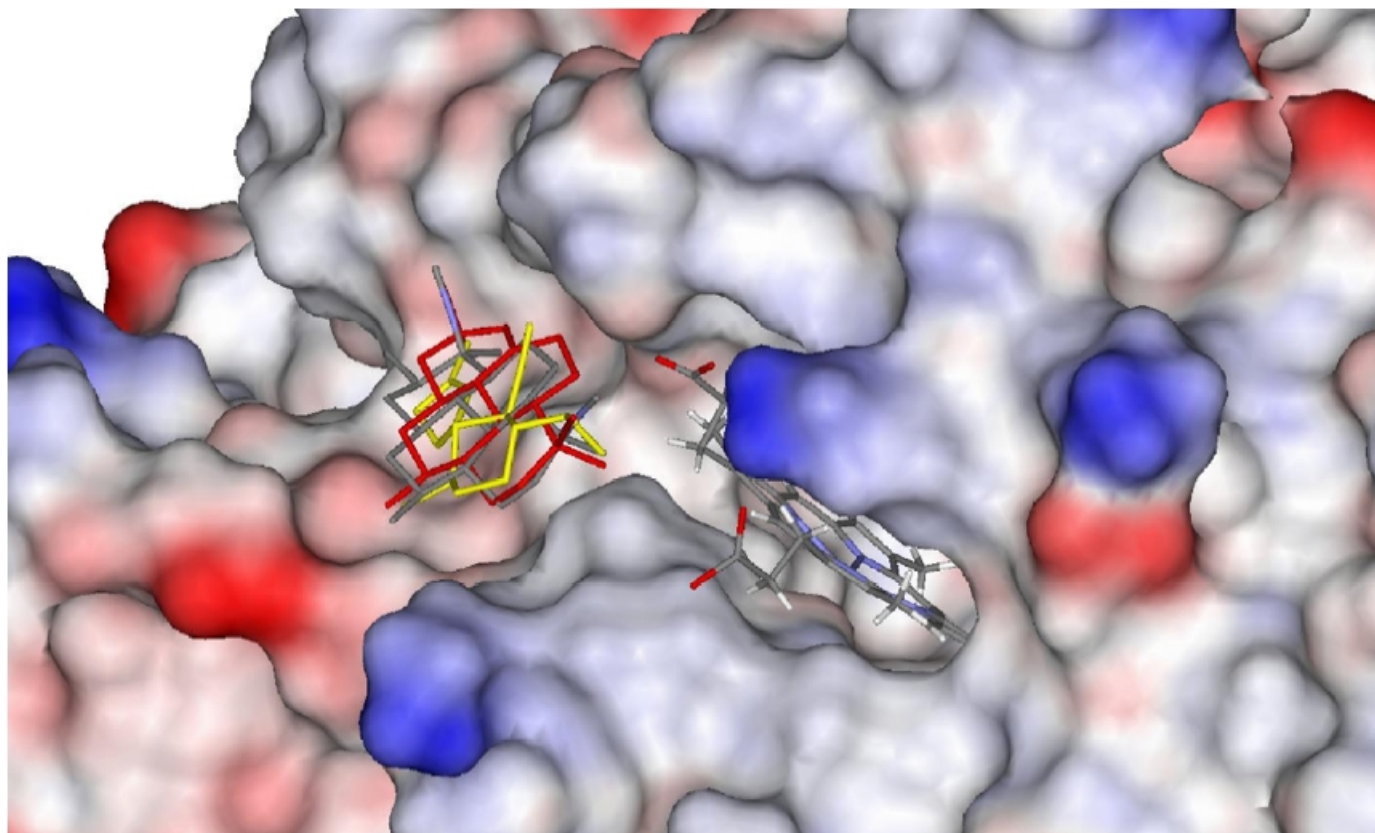

**Figure.** Docked orientations of compound **1** (stick representation, coloured by atom), compound **2** (stick representation, coloured red) and compound **10** (stick representation, coloured yellow). Heme is displayed as stick representation and coloured by atom. For simplicity hydrogen atoms are omitted. The solid surface represents the solvent accessible surface with a probe radius of 1.4 Å.

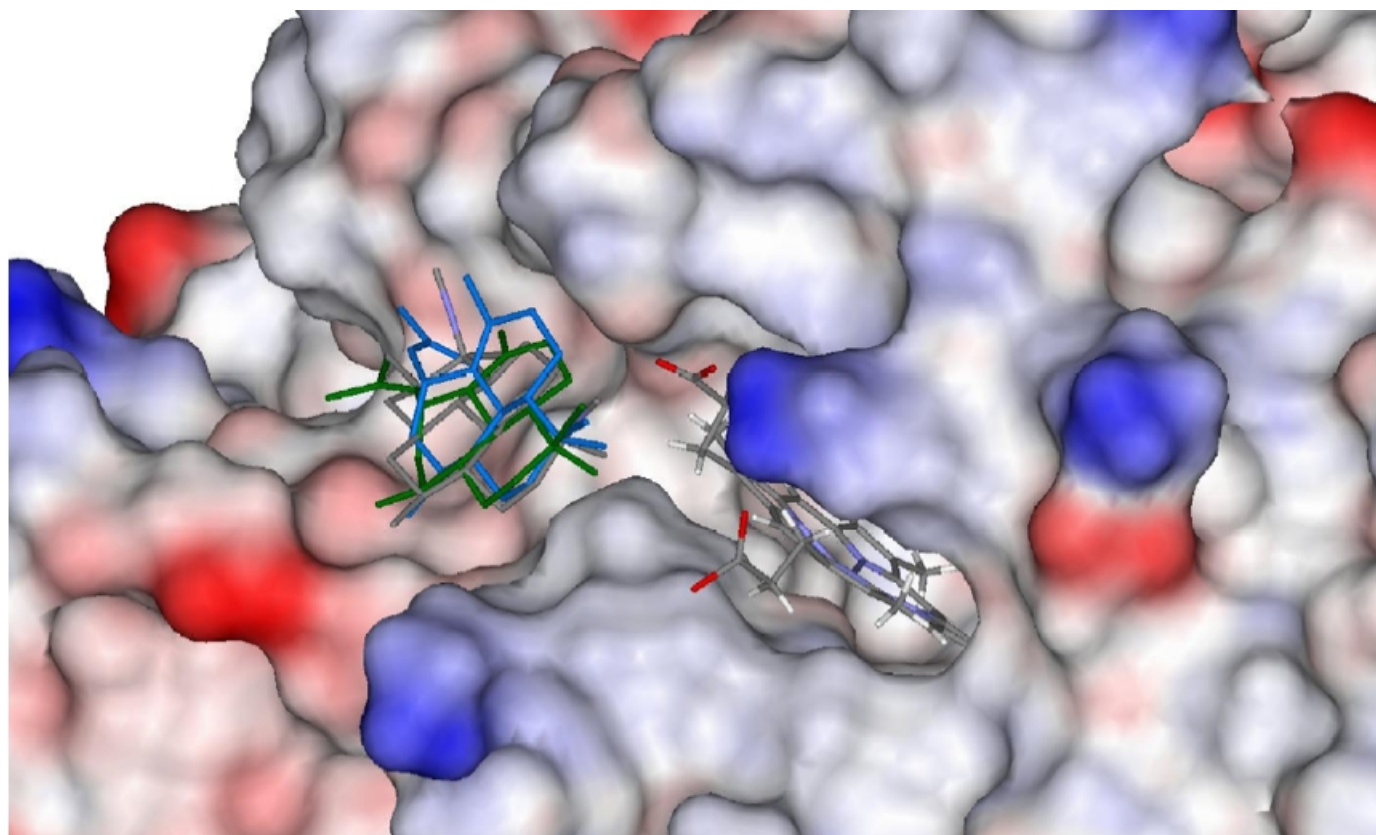

**Figure.** Docked orientations of compound **1** (stick representation, coloured by atom), compound **3** (stick representation, coloured green) and compound **4** (stick representation, coloured blue). Heme is displayed as stick representation and coloured by atom. For simplicity hydrogen atoms are omitted. The solid surface represents the solvent accessible surface with a probe radius of 1.4 Å.

5
